# Supplementary material for: Systems Biology Approach Reveals Genome to Phenome Correlation in Type 2 Diabetes
Source: PLoS One. 2013 Jan 7;8(1):e53522. doi: 10.1371/journal.pone.0053522 (PMC3538588; doi:10.1371/journal.pone.0053522)
Supplement: Dataset S2 — Genes in the total interactome and T2D interactome. This table lists all the genes that constitute the total interactome and the direct interaction network of genes reported in T2D GWASs at p value cutoff of 10−5. These genes are 14,306 and 561 in number, in that order. The interactome data for Homo sapiens in BioGRID was used in combination with the visualization tool Osprey to retrieve gene lists. (XLS) [file pone.0053522.s002.xls]

## Sheet: Sheet1
Dataset S2. Genes in the total interactome and T2D interactome.
Entire interaction network	Interaction network of T2D genome
1700006A11Rik	ABCC8
1810055G02Rik	ACHE
2810046L04Rik	ACLY
4922501C03Rik	ACTB
4930572J05Rik	ACTG1
9830001H06Rik	ACTN4
A1BG	ADAMTS1
A1CF	ADAMTSL4
A2M	AES
AAAS	AKAP2
AACS	AKAP9
AAGAB	AKT1
AAMP	ALK
AANAT	ANK1
AARS	ANXA6
AARS2	AP3B1
AARSD1	AP3D1
AASDHPPT	AP3M1
AASS	AP3S1
AATF	AP3S2
AATK	APP
ABCA1	AR
ABCA13	ARF1
ABCA2	ARF6
ABCA3	ARHGAP5
ABCA4	ARPC3
ABCA7	ATF1
ABCB1	ATF6
ABCB10	AURKA
ABCB11	BARX2
ABCB6	BCL11A
ABCB7	BCL2
ABCB8	BCL2L1
ABCB9	BCL6
ABCC1	C20orf43
ABCC10	C9orf25
ABCC12	CALM1
ABCC2	CALM3
ABCC3	CAMK1D
ABCC4	CBL
ABCC5	CBLB
ABCC8	CCDC85B
ABCC9	CCDC90B
ABCD1	CCND1
ABCD2	CCND2
ABCD3	CCNG1
ABCD4	CCNK
ABCE1	CD19
ABCF1	CD22
ABCF2	CD2BP2
ABCF3	CD3E
ABCG1	CD4
ABCG2	CD72
ABCG5	CD79A
ABCG8	CD79B
ABHD10	CD81
ABHD11	CD86
ABHD12	CDC123
ABHD14B	CDC42BPB
ABHD16A	CDK4
ABHD2	CDK6
ABHD3	CDK9
ABHD4	CDKAL1
ABHD5	CDKN2A
ABHD6	CDKN2B
ABI1	CDX2
ABI2	CEBPA
ABI3	CEBPB
ABI3BP	CENPE
ABL1	CHD4
ABL2	CHD7
ABLIM1	CHUK
ABLIM2	CIT
ABLIM3	CMIP
ABT1	CNTN1
ABTB1	COL1A1
ABTB2	COPS5
ABZ2	CPSF1
ACAA1	CPSF2
ACAA2	CPSF3
ACACA	CPSF6
ACACB	CPSF7
ACAD10	CR1
ACAD11	CR2
ACAD8	CREB1
ACAD9	CREBBP
ACADL	CRIP2
ACADM	CRKL
ACADSB	CRMP1
ACADVL	CSF3R
ACAN	CSTB
ACAP1	CTBP1
ACAP3	CTGF
ACAT1	CTNNB1
ACAT2	CTSB
ACBD3	CTTN
ACBD5	Cbl
ACBD6	Cdk1
ACCN1	DAPK3
ACCN2	DAXX
ACCN3	DAZAP2
ACCS	DCD
ACD	DCTN1
ACE	DLL1
ACE2	DNM2
ACHE	DNTTIP2
ACIN1	DTNB
ACLY	DUSP9
ACMSD	E4F1
ACO1	EDF1
ACO2	EEF2
ACOT13	EGFR
ACOT2	EGLN1
ACOT7	EGLN2
ACOT8	EGLN3
ACOT9	EIF2B1
ACOX1	EIF6
ACOX3	EP300
ACP1	EPHA3
ACP2	EPOR
ACP5	ESR1
ACP6	EXT2
ACPP	EZH2
ACR	F3
ACSBG1	F7
ACSF2	FABP1
ACSF3	FAM107A
ACSL1	FBN1
ACSL3	FCER1G
ACSL4	FCER2
ACSL5	FCGR2A
ACSM3	FCRL3
ACSS2	FGFR1
ACT1	FGR
ACTA1	FHL2
ACTA2	FHOD1
ACTB	FIP1L1
ACTBL2	FITM2
ACTC1	FKBP2
ACTG1	FLNA
ACTG2	FLNB
ACTL6A	FN1
ACTL6B	FOS
ACTL7A	FOXO1
ACTL8	FTCD
ACTN1	FTO
ACTN2	FYN
ACTN3	GADD45G
ACTN4	GAPDH
ACTR10	GLIS3
ACTR1A	GOLGA3
ACTR1B	GPC1
ACTR2	GPRIN2
ACTR3	GRB10
ACTR3B	GRB14
ACTR5	GRB2
ACTR6	GRIP1
ACTR8	GSK3B
ACVR1	GTF2A1L
ACVR1B	Gadd45b
ACVR2A	HDAC1
ACVR2B	HDAC2
ACVRL1	HDAC3
ACY1	HDAC4
ACYP1	HDAC5
ADA	HDAC6
ADA2	HDAC9
ADAM1	HDGF
ADAM10	HHEX
ADAM11	HIPK2
ADAM12	HIST1H3A
ADAM15	HMG20A
ADAM17	HMGA1
ADAM19	HMGA2
ADAM2	HNF1A
ADAM22	HNF1B
ADAM33	HNF4A
ADAM9	HNRNPA1
ADAMTS1	HNRNPA2B1
ADAMTS10	HNRNPC
ADAMTS2	HNRNPK
ADAMTS4	HPCAL1
ADAMTS5	HSP90AA1
ADAMTSL4	HSP90AB1
ADAP1	HSPA4
ADAP2	HSPA8
ADAR	HSPA9
ADARB1	HUNK
ADAT1	HUWE1
ADAT3	ICT1
ADCK2	IDE
ADCK3	IFIH1
ADCK4	IFITM1
ADCY2	IFNA1
ADCY3	IGF1
ADCY5	IGF1R
ADCY6	IGF2
ADCY7	IGF2BP2
ADCY8	IGFBP7
ADCY9	IKBKAP
ADCYAP1	IKBKB
ADD1	ING1
ADD2	ING4
ADD3	INSR
ADH5	IRS1
ADH7	IRS2
ADI1	ITGB2
ADIPOR1	ITGB6
ADK	JAG1
ADNP	JAG2
ADNP2	JAK1
ADO	JAK2
ADORA1	JAK3
ADORA2A	JAZF1
ADORA2B	JMJD1C
ADORA3	JUP
ADPRHL2	KAT2B
ADRA1B	KAT5
ADRA2A	KCNE1
ADRA2B	KCNE2
ADRA2C	KCNJ11
ADRB1	KCNJ8
ADRB2	KCNQ1
ADRB3	KCNQ2
ADRBK1	KDM1A
ADRBK2	KDR
ADRM1	KHDRBS1
ADSL	KIAA1377
ADSS	KIF11
AEBP1	KIF1A
AEBP2	KIF23
AEN	KIF4A
AES	KLF14
AFAP1	KRT20
AFAP1L1	KRTAP4-12
AFF1	Kif4
AFF3	L1CAM
AFF4	LAMTOR3
AFG3L2	LAT
AFP	LCK
AFTPH	LDHA
AGA	LPIN2
AGAP1	LRIF1
AGAP2	LYN
AGAP3	MAEA
AGBL2	MAFF
AGER	MAGEA11
AGFG1	MAGOHB
AGFG2	MAML1
AGGF1	MAPK1
AGK	MAPK3
AGL	MAPK6
AGO1	MAPK8
AGO4	MARCH1'
AGPAT2	MBD3
AGPAT3	MCM6
AGPAT4	MDM2
AGPAT5	MDM4
AGPAT6	MECP2
AGPAT9	MED1
AGPHD1	MED14
AGPS	MED16
AGR3	MED17
AGRN	MED21
AGRP	MED23
AGT	MED24
AGTPBP1	MED7
AGTR1	MEPCE
AGTR2	MMRN1
AGTRAP	MS4A2
AGXT2L1	MSX2
AGXT2L2	MTA1
AHCTF1	MTA2
AHCTF1P1	MTOR
AHCY	MTR
AHCYL1	MYC
AHCYL2	MYL12A
AHDC1	MYSM1
AHNAK	Mapk13
AHNAK2	NCK2
AHR	NCOA1
AHRR	NCOA2
AHSA1	NCOA3
AHSA2	NCOA4
AHSG	NCOA6
AHSP	NCOR1
AI837181	NCOR2
AICDA	NEDD4
AIDA	NEDD4L
AIF1	NFE2L2
AIF1L	NFKB1
AIFM1	NFKBIB
AIFM2	NISCH
AIM1L	NLK
AIM46	NOS1AP
AIMP1	NOTCH2
AIMP2	NPM1
AIP	NPPA
AIPL1	NR0B1
AIRE	NR0B2
AJAP1	NR1H2
AJUBA	NR1I3
AK1	NR2C2
AK2	NR2E3
AK4	NR2F1
AK5	NR5A1
AK7	NRIP1
AKAP1	NRP1
AKAP10	NUBP1
AKAP11	NUDT21
AKAP12	Nedd4
AKAP13	OBSCN
AKAP14	PAAF1
AKAP17A	PABPC1
AKAP2	PABPC4
AKAP3	PAG1
AKAP4	PARP1
AKAP5	PCBD1
AKAP6	PCBD2
AKAP7	PCK1
AKAP8	PCNA
AKAP8L	PDCD6
AKAP9	PDGFRB
AKIP1	PEPD
AKIRIN2	PGF
AKNA	PIAS1
AKR1A1	PIAS2
AKR1B1	PIAS3
AKR1B10	PIK3CA
AKR1C1	PIK3R1
AKR1C2	PIK3R3
AKR1C3	PLCG1
AKR7A2	PLCG2
AKR7A3	PLEKHA8
AKR7L	PLG
AKT1	PLS1
AKT1S1	PLSCR1
AKT2	PLXNB1
AKT3	PML
AKTIP	PNRC1
ALAD	PNRC2
ALAS1	POLA1
ALAS2	POLR2A
ALB	POLR2B
ALB1	POU1F1
ALCAM	PPARG
ALDH16A1	PPARGC1A
ALDH18A1	PPARGC1B
ALDH1A1	PPFIA1
ALDH1A2	PPP1CA
ALDH1A3	PPP1R9B
ALDH1B1	PPP2CA
ALDH1L2	PPP2R1A
ALDH2	PPP2R1B
ALDH2C4	PRC1
ALDH3A2	PRKACA
ALDH3B1	PRKAR2A
ALDH3B2	PRKCA
ALDH4A1	PRKCD
ALDH5A1	PRKCZ
ALDH7A1	PRKD1
ALDH9A1	PRMT1
ALDOA	PRMT6
ALDOB	PROX1
ALDOC	PSEN1
ALG1	PSMA2
ALG10	PSMA5
ALG10B	PSMB5
ALG11	PSMC1
ALG13	PSMC2
ALG14	PSMC3
ALG2	PSMC4
ALG3	PSMC5
ALG5	PSMC6
ALG8	PSMD1
ALG9	PSMD10
ALK	PSMD11
ALKBH1	PSMD12
ALKBH2	PSMD13
ALKBH5	PSMD14
ALL1	PSMD2
ALMS1	PSMD3
ALOX12	PSMD4
ALOX5	PSMD6
ALOXE3	PSMD7
ALPI	PSMD8
ALPP	PSME3
ALPPL2	PTK2
ALS2	PTK2B
ALS2CL	PTPN1
ALS2CR11	PTPN11
ALS2CR12	PTPN6
ALS2CR8	PTPRD
ALX1	PTPRS
ALX4	PUF60
AMBP	PXN
AMBRA1	Plk1
AMD1	RABEP1
AMDHD1	RAC3
AMDHD2	RAD50
AMFR	RAD51D
AMHR2	RAF1
AMIGO1	RB1
AMIGO2	RBM43
AMIGO3	RBM7
AMMECR1	RBMS1
AMMECR1L	RBPJ
AMOT	RELA
AMOTL1	RHAG
AMOTL2	RHPN2
AMPD2	RIN2
AMPD3	RND3
AMPH	ROCK1
AMY1A	RPAP1
AMZ2	RPL11
ANAPC1	RPRD2
ANAPC10	RPS6KB1
ANAPC11	RPS6KB2
ANAPC13	RUVBL2
ANAPC16	RXRA
ANAPC2	RXRB
ANAPC4	RYK
ANAPC5	Racgap1
ANAPC7	SAP25
ANG	SDHB
ANGEL1	SERPINH1
ANGEL2	SERTAD1
ANGPT1	SETDB1
ANGPT2	SF3A1
ANGPT4	SF3B1
ANK1	SF3B3
ANK2	SFN
ANK3	SFPQ
ANKFY1	SH3BP2
ANKH	SH3KBP1
ANKHD1	SHC1
ANKHD1-EIF4EBP3	SIAH2
ANKIB1	SIRPB1
ANKLE1	SIRT1
ANKLE2	SIRT4
ANKMY2	SIT1
ANKRA2	SLA
ANKRD1	SLC44A3
ANKRD10	SLC4A1
ANKRD11	SLC4A3
ANKRD12	SLX1B
ANKRD13A	SMAD1
ANKRD13B	SMAD3
ANKRD13C	SMAD4
ANKRD13D	SMAD5
ANKRD17	SMAD9
ANKRD18A	SMARCA4
ANKRD18B	SMARCC1
ANKRD18DP	SMURF1
ANKRD2	SNAP23
ANKRD22	SNCG
ANKRD23	SNRPA
ANKRD24	SNRPA1
ANKRD26	SNRPB
ANKRD27	SOCS1
ANKRD28	SP1
ANKRD30A	SPARC
ANKRD32	SPRY2
ANKRD35	SPRYD5
ANKRD36BP1	SPTA1
ANKRD37	SPTB
ANKRD39	SRC
ANKRD40	SREBF1
ANKRD42	SREBF2
ANKRD44	SRR
ANKRD46	ST6GAL1
ANKRD5	STAT3
ANKRD52	STK16
ANKRD53	SUB1
ANKRD55	SUFU
ANKRD57	SUMO1
ANKRD6	SUMO2
ANKS1A	SVIL
ANKS1B	SYK
ANKZF1	SYMPK
ANLN	SYN1
ANO1	SYN2
ANO10	SYN3
ANO2	SYVN1
ANO5	TCERG1
ANO6	TCF7L2
ANP32A	TELO2
ANP32AP1	TESC
ANP32B	TESK1
ANP32E	TFAP2A
ANPEP	TGS1
ANTXR1	THADA
ANTXR2	TIAM1
ANXA1	TNFAIP3
ANXA10	TNK2
ANXA11	TNKS2
ANXA13	TOP1
ANXA2	TP53
ANXA2P2	TP53INP1
ANXA3	TRAF2
ANXA4	TRAF6
ANXA5	TRIM24
ANXA6	TRIM37
ANXA7	TRIP12
ANXA8	TRIP4
ANXA8L1	TTN
ANXA8L2	TUBA1A
ANXA9	TUBA1C
AOX1	TUBB
AP1AR	TUBB4B
AP1B1	TUBG1
AP1G1	Thrb
AP1G2	Tubb5
AP1M1	UBAC1
AP1M2	UBC
AP1S1	UBE2A
AP1S2	UBE2I
AP1S3	UBE3C
AP2A1	UBE4B
AP2A2	UBR1
AP2B1	UBTF
AP2M1	UBXN11
AP2S1	UCHL1
AP3B1	UCHL5
AP3B2	USHBP1
AP3D1	USP14
AP3M1	USP2
AP3S1	USP20
AP3S2	USP26
AP4B1	Ubc
AP4E1	VAV1
AP4M1	VDAC1
AP4S1	VDR
APAF1	VEGFA
APBA1	VHL
APBA2	VPS26A
APBA3	VTN
APBB1	WBP2
APBB1IP	WDR33
APBB2	WFS1
APBB3	WIPF2
APC	WWOX
APC11	XPO1
APC2	XRCC5
APCS	XRCC6
APE2	YWHAB
APEH	YWHAE
APEX1	YWHAH
APEX2	YWHAZ
APH1A	YY1
APH1B	ZBTB16
API5	ZBTB20
APIP	ZBTB3
APITD1	ZBTB5
APJ1	ZBTB9
APLF	ZFAND6
APLP1	ZHX2
APLP2	ZNF266
APM2	ZNF496
APOA1	ZNHIT3
APOA1BP	ZSCAN1
APOA2
APOA4
APOB
APOBEC1
APOBEC2
APOBEC3A
APOBEC3B
APOBEC3C
APOBEC3F
APOBEC3G
APOC1
APOC2
APOC3
APOD
APOE
APOF
APOH
APOL1
APOL2
APOM
APOOL
APOPT1
APP
APPBP2
APPL1
APPL2
APRT
APTX
AQP1
AQP2
AQP3
AQP4
AQP5
AQP9
AQR
AR
ARAF
ARAP1
ARAP3
ARC
ARCN1
AREG
ARF1
ARF3
ARF4
ARF5
ARF6
ARFGAP1
ARFGAP2
ARFGAP3
ARFGEF1
ARFGEF2
ARFIP1
ARFIP2
ARFRP1
ARG1
ARG2
ARGLU1
ARHGAP1
ARHGAP10
ARHGAP11A
ARHGAP12
ARHGAP15
ARHGAP17
ARHGAP18
ARHGAP19
ARHGAP20
ARHGAP21
ARHGAP22
ARHGAP23
ARHGAP26
ARHGAP27
ARHGAP29
ARHGAP31
ARHGAP32
ARHGAP33
ARHGAP35
ARHGAP4
ARHGAP44
ARHGAP5
ARHGAP8
ARHGAP9
ARHGDIA
ARHGDIB
ARHGDIG
ARHGEF1
ARHGEF10
ARHGEF11
ARHGEF12
ARHGEF15
ARHGEF16
ARHGEF17
ARHGEF18
ARHGEF19
ARHGEF2
ARHGEF25
ARHGEF3
ARHGEF35
ARHGEF4
ARHGEF40
ARHGEF5
ARHGEF6
ARHGEF7
ARHGEF9
ARID1A
ARID1B
ARID2
ARID3A
ARID3B
ARID4A
ARID4B
ARID5A
ARID5B
ARIH1
ARIH2
ARL1
ARL10
ARL11
ARL13B
ARL15
ARL16
ARL2
ARL2BP
ARL3
ARL4A
ARL4C
ARL4D
ARL5A
ARL5B
ARL6
ARL6IP1
ARL6IP4
ARL6IP5
ARL6IP6
ARL8A
ARL8B
ARMC1
ARMC10
ARMC5
ARMC6
ARMC7
ARMC8
ARMC9
ARMCX2
ARMCX3
ARMCX5
ARNT
ARNT2
ARNTL
ARNTL2
ARO1
ARPC1A
ARPC1B
ARPC2
ARPC3
ARPC3P1
ARPC4
ARPC4-TTLL3
ARPC5
ARPC5L
ARPP19
ARR3
ARRB1
ARRB2
ARRDC1
ARRDC2
ARRDC3
ARRDC4
ARSA
ARSE
ARTN
ARV1
ARVCF
AS3MT
ASAH1
ASAH2
ASAH2B
ASAH2C
ASAP1
ASAP2
ASB1
ASB12
ASB13
ASB2
ASB3
ASB4
ASB6
ASB7
ASB8
ASB9
ASCC1
ASCC2
ASCC3
ASCL1
ASCL2
ASCL3
ASCL4
ASF1A
ASF1B
ASGR1
ASGR2
ASH1L
ASH2L
ASL
ASM4
ASMTL
ASNA1
ASNS
ASNSD1
ASPA
ASPH
ASPM
ASPRV1
ASPSCR1
ASRGL1
ASS1
ASTN1
ASUN
ASXL1
ASXL2
ATAD1
ATAD2
ATAD3A
ATAD3B
ATAD5
ATE1
ATF1
ATF2
ATF3
ATF4
ATF5
ATF6
ATF6B
ATF7
ATF7IP
ATF7IP2
ATG10
ATG12
ATG13
ATG14
ATG15
ATG16L1
ATG16L2
ATG2A
ATG2B
ATG3
ATG4B
ATG4C
ATG4D
ATG5
ATG7
ATG9A
ATIC
ATL1
ATL2
ATL3
ATM
ATMS1
ATN1
ATOX1
ATP10D
ATP11A
ATP11B
ATP11C
ATP12A
ATP13A1
ATP13A2
ATP13A3
ATP1A1
ATP1A2
ATP1A3
ATP1A4
ATP1B1
ATP1B3
ATP2A1
ATP2A2
ATP2A3
ATP2B1
ATP2B2
ATP2B3
ATP2B4
ATP2C1
ATP2C2
ATP4A
ATP5A1
ATP5B
ATP5C1
ATP5D
ATP5E
ATP5F1
ATP5G1
ATP5G3
ATP5H
ATP5I
ATP5J
ATP5J2
ATP5L
ATP5O
ATP6
ATP6AP1
ATP6AP2
ATP6V0A1
ATP6V0A2
ATP6V0A4
ATP6V0C
ATP6V0D1
ATP6V1A
ATP6V1B1
ATP6V1B2
ATP6V1C1
ATP6V1D
ATP6V1E1
ATP6V1E2
ATP6V1F
ATP6V1G1
ATP6V1G2
ATP6V1H
ATP7A
ATP7B
ATP8
ATP8A1
ATP8B2
ATP8B3
ATP9A
ATP9B
ATPAF1
ATPBD4
ATPIF1
ATR
ATRIP
ATRN
ATRNL1
ATRX
ATXN1
ATXN10
ATXN1L
ATXN2
ATXN2L
ATXN3
ATXN3L
ATXN7
ATXN7L1
ATXN7L2
ATXN7L3
ATXN7L3B
AUH
AUP1
AURKA
AURKAIP1
AURKB
AURKC
AVEN
AVIL
AVL9
AVP
AVPI1
AVPR1A
AVPR1B
AVPR2
AXIN1
AXIN2
AXL
AYR1
AZGP1
AZGP1P1
AZI1
AZI2
AZIN1
AZU1
Act5C
Actb
Actg1
Actl6a
Actl6b
Actn1
Actn2
Actn3
Actn4
Actr1a
Actr1b
Actr8
Acvr1b
Add1
Adrb3
Adrbk1
Adrm1
Agap2
Agrn
Agtrap
Aif1l
Akap1
Akap12
Akap9
Akt1
Akt2
Aldoa
Alg2
Anapc1
Anapc13
Anapc16
Anapc2
Anapc5
Ank2
Ankmy2
Anln
Anxa6
Ap1b1
Ap2a1
Ap2b1
Ap2m1
Ap3b2
Apba1
Apba2
Apbb1
Apbb2
Apc
Apc2
Apob
Ar
Arfrp1
Arhgap15
Arhgap31
Arhgdia
Arhgdib
Arhgef1
Arhgef11
Arhgef6
Arhgef7
Arl2
Arl3
Arl4d
Arl5b
Arrb1
Arrb2
Asb4
Ash2l
Asna1
At1g04410
At1g07920
At1g07930
At1g07940
At1g09310
At1g80930
At2g01720
At2g04520
At2g30620
At2g31610
At2g36950
At2g40650
At2g47610
At3g03773
At3g05900
At3g08530
At3g09440
At3g11130
At3g12630
At3g49660
At3g50520
At3g53230
At3g53870
At3g62870
At4g24110
At4g24690
At4g36130
At5g02490
At5g03340
At5g04120
At5g35530
At5g35680
At5g46630
At5g60390
Atf2
Atf4
Atf7ip
Atg16l1
Atm
Atp1a1
Atp1b1
Atp5c1
Atp5f1
Atp5h
Atp6v0a1
Atp6v0d1
Atp6v1a
Atp6v1b2
Atr
Atxn3
Aurka
Aurkb
Aven
Axin1
Azi1
B2M
B3GALNT2
B3GALT1
B3GALT4
B3GALT6
B3GAT3
B3GNT1
B3GNT2
B3GNTL1
B4GALNT1
B4GALT1
B4GALT3
B4GALT5
B4galt1
B7H6
B9D1
BAALC
BAAT
BABAM1
BACE1
BACE2
BACH1
BACH2
BAD
BAG1
BAG2
BAG3
BAG4
BAG5
BAG6
BAG7
BAHCC1
BAHD1
BAI1
BAI2
BAIAP2
BAIAP2L1
BAIAP3
BAK1
BAK1P1
BAMBI
BANF1
BANK1
BANP
BAP1
BARD1
BARHL1
BARX1
BARX2
BASP1
BATF
BATF2
BATF3
BAX
BAZ1A
BAZ1B
BAZ2A
BAZ2B
BBC3
BBOX1
BBS1
BBS10
BBS2
BBS4
BBS7
BBX
BCAM
BCAN
BCAP29
BCAP31
BCAR1
BCAR3
BCAS1
BCAS2
BCAS3
BCAS4
BCAT1
BCAT2
BCAT4
BCCIP
BCDIN3D
BCHE
BCKDHA
BCKDK
BCL10
BCL11A
BCL11B
BCL2
BCL2A1
BCL2L1
BCL2L10
BCL2L11
BCL2L12
BCL2L13
BCL2L14
BCL2L2
BCL3
BCL6
BCL6B
BCL7A
BCL7B
BCL7C
BCL9
BCLAF1
BCOR
BCORL1
BCR
BCS1L
BDH2
BDKRB1
BDKRB2
BDNF
BEAN1
BECN1
BEGAIN
BEND3
BEND5
BEND7
BEST1
BET1
BET1L
BET3
BEX1
BEX2
BEX4
BFAR
BFSP1
BGN
BHLHB9
BHLHE40
BHLHE41
BHMT
BICD1
BICD2
BID
BIK
BIN1
BIN2
BIN3
BIP1
BIP2
BIRC2
BIRC3
BIRC5
BIRC6
BIRC7
BIRC8
BLID
BLK
BLM
BLMH
BLNK
BLOC1S1
BLOC1S2
BLOC1S3
BLVRA
BLVRB
BLZF1
BMF
BMI1
BMP1
BMP2
BMP2K
BMP4
BMP6
BMP7
BMPR1A
BMPR1B
BMPR2
BMS1
BMX
BNA1
BNC1
BNC2
BNIP1
BNIP2
BNIP3
BNIP3L
BNIPL
BOC
BOD1
BOD1L
BOK
BOLA1
BOLA2
BOP1
BORA
BPGM
BPHL
BPIFA1
BPIFB1
BPIFB3
BPNT1
BPTF
BPY2
BRAF
BRAP
BRAT1
BRCA1
BRCA2
BRCA2(IV)
BRCC3
BRD1
BRD2
BRD3
BRD4
BRD7
BRD8
BRD9
BRDT
BRE
BRF1
BRF2
BRI3BP
BRIP1
BRIX1
BRK1
BRLF1
BRMS1
BRMS1L
BROX
BRP44
BRP44L
BRPF1
BRPF3
BRSK1
BRSK2
BRWD1
BRWD3
BSCL2
BSDC1
BSG
BSN
BST1
BST2
BTAF1
BTBD1
BTBD10
BTBD2
BTBD3
BTBD7
BTBD8
BTBD9
BTF3
BTF3L4
BTF3P9
BTG1
BTG2
BTG3
BTG4
BTK
BTLA
BTN1A1
BTN2A1
BTN2A2
BTN3A1
BTN3A2
BTN3A3
BTNL2
BTRC
BUB1
BUB1B
BUB3
BUD13
BUD31
BYSL
BZRAP1
BZW1
BZW2
Bach1
Bag6
Bak1
Banp
Bap1
Batf3
Baz2a
Bcas1
Bcas2
Bcl10
Bcl2
Bcl2l11
Bcl7b
Bcl9l
Bcor
Bcr
Becn1
Bicd2
Bmi1
Bmpr1a
Bmpr2
Brsk1
Bsdc1
Btbd2
Bub1
Bub1b
Bud13
C10orf10
C10orf116
C10orf118
C10orf12
C10orf137
C10orf2
C10orf26
C10orf32
C10orf35
C10orf46
C10orf54
C10orf58
C10orf62
C10orf76
C10orf82
C10orf88
C10orf90
C11orf1
C11orf10
C11orf16
C11orf2
C11orf30
C11orf41
C11orf46
C11orf48
C11orf49
C11orf51
C11orf54
C11orf58
C11orf63
C11orf65
C11orf67
C11orf68
C11orf73
C11orf80
C11orf83
C11orf84
C11orf9
C12orf10
C12orf12
C12orf23
C12orf29
C12orf35
C12orf4
C12orf44
C12orf45
C12orf48
C12orf5
C12orf51
C12orf57
C12orf62
C12orf63
C13orf27
C14orf1
C14orf102
C14orf119
C14orf129
C14orf133
C14orf135
C14orf166
C14orf169
C14orf2
C14orf21
C14orf43
C14orf80
C14orf93
C15orf23
C15orf24
C15orf29
C15orf38
C15orf39
C15orf40
C15orf41
C15orf42
C15orf44
C15orf55
C15orf58
C15orf63
C16orf13
C16orf42
C16orf45
C16orf48
C16orf5
C16orf53
C16orf58
C16orf59
C16orf61
C16orf62
C16orf7
C16orf70
C16orf74
C16orf78
C16orf80
C16orf88
C17orf101
C17orf28
C17orf42
C17orf49
C17orf53
C17orf61
C17orf62
C17orf70
C17orf76-AS1
C17orf79
C17orf81
C17orf85
C18orf21
C18orf25
C18orf32
C18orf54
C18orf56
C18orf8
C19orf10
C19orf12
C19orf21
C19orf25
C19orf29
C19orf40
C19orf42
C19orf43
C19orf44
C19orf46
C19orf51
C19orf52
C19orf53
C19orf54
C19orf57
C19orf6
C19orf60
C19orf63
C19orf68
C19orf70
C19orf79
C1D
C1GALT1
C1GALT1C1
C1QA
C1QBP
C1R
C1S
C1orf109
C1orf111
C1orf112
C1orf116
C1orf123
C1orf124
C1orf144
C1orf174
C1orf182
C1orf190
C1orf198
C1orf212
C1orf216
C1orf27
C1orf31
C1orf35
C1orf43
C1orf50
C1orf52
C1orf55
C1orf63
C1orf65
C1orf68
C1orf9
C1orf94
C1qbp
C2
C20orf11
C20orf111
C20orf195
C20orf196
C20orf20
C20orf24
C20orf27
C20orf3
C20orf30
C20orf4
C20orf43
C20orf7
C20orf72
C20orf94
C20orf96
C21orf2
C21orf33
C21orf56
C21orf58
C21orf59
C21orf63
C21orf7
C21orf91
C22orf13
C22orf28
C22orf39
C2CD2
C2CD2L
C2CD3
C2orf18
C2orf29
C2orf43
C2orf44
C2orf47
C2orf51
C2orf56
C2orf65
C2orf73
C2orf76
C2orf88
C3
C3orf15
C3orf17
C3orf19
C3orf26
C3orf37
C3orf38
C3orf75
C4A
C4B
C4BPA
C4orf17
C4orf21
C4orf27
C4orf29
C4orf32
C4orf34
C4orf41
C4orf42
C4orf43
C4orf49
C5
C5AR1
C5orf13
C5orf15
C5orf22
C5orf24
C5orf25
C5orf32
C5orf34
C5orf41
C5orf42
C5orf44
C5orf51
C5orf54
C5orf55
C5orf62
C6
C6orf106
C6orf108
C6orf115
C6orf130
C6orf136
C6orf15
C6orf165
C6orf170
C6orf192
C6orf203
C6orf211
C6orf25
C6orf47
C6orf72
C6orf89
C6orf97
C7
C7orf25
C7orf26
C7orf30
C7orf34
C7orf41
C7orf42
C7orf43
C7orf44
C7orf50
C7orf58
C7orf74
C8A
C8B
C8G
C8orf33
C8orf4
C8orf47
C8orf48
C8orf55
C8orf59
C8orf73
C8orf76
C9
C9orf100
C9orf106
C9orf114
C9orf125
C9orf140
C9orf142
C9orf156
C9orf16
C9orf163
C9orf167
C9orf169
C9orf23
C9orf25
C9orf30
C9orf40
C9orf41
C9orf46
C9orf5
C9orf64
C9orf7
C9orf72
C9orf78
C9orf80
C9orf82
C9orf86
C9orf89
C9orf9
CA1
CA11
CA12
CA2
CA4
CA5A
CA8
CA9
CAB39
CAB39L
CABIN1
CABLES1
CABLES2
CABP1
CABP2
CABP4
CABP5
CAC2
CACHD1
CACNA1A
CACNA1B
CACNA1C
CACNA1D
CACNA1E
CACNA1F
CACNA1H
CACNA1S
CACNA2D1
CACNA2D2
CACNB1
CACNB3
CACNB4
CACNG2
CACYBP
CAD
CADM1
CADM3
CADM4
CADPS
CADPS2
CALB1
CALB2
CALCOCO1
CALCOCO2
CALCR
CALCRL
CALD1
CALM1
CALM2
CALM3
CALML3
CALML5
CALR
CALR3
CALU
CAMK1
CAMK1D
CAMK2A
CAMK2B
CAMK2D
CAMK2G
CAMK4
CAMKK2
CAMKV
CAMLG
CAMP
CAMSAP1
CAMSAP2
CAMSAP3
CAMTA2
CAND1
CAND2
CANX
CAP1
CAP2
CAPG
CAPN1
CAPN2
CAPN3
CAPN5
CAPN7
CAPNS1
CAPRIN1
CAPZA1
CAPZA2
CAPZA3
CAPZB
CARD10
CARD11
CARD14
CARD6
CARD8
CARD9
CARHSP1
CARKD
CARM1
CARNS1
CARS
CASC3
CASC5
CASK
CASKIN1
CASKIN2
CASP1
CASP10
CASP12
CASP14
CASP2
CASP3
CASP4
CASP5
CASP6
CASP7
CASP8
CASP8AP2
CASP9
CASQ2
CASR
CAST
CAT
CAT2
CATSPER1
CATSPERG
CAV1
CAV2
CAV3
CB5-B
CB5-E
CBFA2T2
CBFA2T3
CBFB
CBL
CBLB
CBLC
CBLL1
CBR1
CBR3
CBR4
CBS
CBWD1
CBWD2
CBWD3
CBWD5
CBWD6
CBWD7
CBX1
CBX2
CBX3
CBX4
CBX5
CBX6
CBX7
CBX8
CBY1
CC2D1A
CC2D2A
CCAR1
CCBL2
CCBP2
CCC2
CCDC101
CCDC104
CCDC106
CCDC109B
CCDC11
CCDC112
CCDC113
CCDC115
CCDC116
CCDC117
CCDC12
CCDC120
CCDC124
CCDC127
CCDC130
CCDC132
CCDC134
CCDC136
CCDC137
CCDC138
CCDC14
CCDC141
CCDC147
CCDC149
CCDC15
CCDC155
CCDC158
CCDC165
CCDC168
CCDC17
CCDC19
CCDC22
CCDC23
CCDC24
CCDC28A
CCDC33
CCDC42
CCDC43
CCDC47
CCDC50
CCDC51
CCDC53
CCDC56
CCDC58
CCDC59
CCDC6
CCDC64B
CCDC67
CCDC69
CCDC7
CCDC71
CCDC75
CCDC77
CCDC8
CCDC82
CCDC85A
CCDC85B
CCDC85C
CCDC86
CCDC87
CCDC88A
CCDC88B
CCDC88C
CCDC9
CCDC90B
CCDC91
CCDC92
CCDC93
CCDC94
CCDC97
CCDC99
CCHCR1
CCK
CCKAR
CCKBR
CCL11
CCL13
CCL14
CCL17
CCL18
CCL19
CCL2
CCL20
CCL21
CCL22
CCL23
CCL25
CCL3
CCL3L1
CCL4
CCL5
CCL7
CCL8
CCNA1
CCNA2
CCNB1
CCNB1IP1
CCNB2
CCNB3
CCNC
CCND1
CCND2
CCND3
CCNDBP1
CCNE1
CCNE2
CCNF
CCNG1
CCNG2
CCNH
CCNI
CCNK
CCNL1
CCNL2
CCNO
CCNT1
CCNT2
CCNY
CCNYL1
CCP110
CCPG1
CCR1
CCR10
CCR3
CCR4
CCR5
CCR6
CCR7
CCS
CCT2
CCT3
CCT4
CCT5
CCT6A
CCT6B
CCT6P1
CCT7
CCT8
CCZ1
CCZ1B
CD101
CD14
CD151
CD163
CD164
CD180
CD19
CD1D
CD2
CD200
CD209
CD22
CD226
CD24
CD244
CD247
CD27
CD276
CD28
CD2AP
CD2BP2
CD320
CD33
CD34
CD36
CD38
CD3D
CD3E
CD3EAP
CD3G
CD4
CD40
CD40LG
CD44
CD46
CD47
CD48
[truncated: 12,308 more rows]
