# Supplementary material for: Systems Biology Approach Reveals Genome to Phenome Correlation in Type 2 Diabetes
Source: PLoS One. 2013 Jan 7;8(1):e53522. doi: 10.1371/journal.pone.0053522 (PMC3538588; doi:10.1371/journal.pone.0053522)
Supplement: Dataset S3 — Antidiabetic drug interacting genes. This table provides list of genes which interact with antidiabetic drugs pioglitazone, troglitazone, rosiglitazone, metformin, tolbutamide and glyburide. There are 121, 172, 518, 76, 17 and 23 genes in these lists, in that order. The gene lists were retrieved from Comparative Toxicogenomics Database (CTD). (XLS) [file pone.0053522.s003.xls]

## Sheet: Sheet1
Dataset S3. Antidiabetic drug interacting genes.
Pioglitazone	Troglitazone	Rosiglitazone	Metformin	Tolbutamide	Glyburide	Glipizide	Gliclazide	Nateglinide	Repaglinide	Sitagliptin	Saxagliptin	Bromocriptine	Acarbose	Vildagliptin	Liraglutide	Exenatide
ABCB11	ABCB11	ABCA1	ABCB1B	ABCC8	ABCB11	CYP2C9	ABCC8	ABCC4	CYP2C8	DPP4	DPP4	ABCB1	AAGR-2	DPP4	GLP1R	ACP5
ACTA2	ABCB1B	ABCB11	ABCC9	ALB	ABCC1	PCK1	ALB	CYP2C9	CYP3A4			ABCB1B	ADIPOQ	DPP8		BGLAP
ADAM9	ABCB4	ABCC9	ACACA	CCND1	ABCC8		BCL2	CYP3A4	SLC15A1			AKR1C3	CCL2			GLP1R
ADIPOQ	ABCC3	ABCG1	ACACB	CCND3	ABCC9		CASP3		SLCO1B1			ATF3	CYP2E1			LRP5
ADM	ABCG2	ACADL	ACTN1	CDKN1A	AHR		CAT					BAX	FASN			SOST
AGTR2	ACTA2	ACADS	ADIPOQ	CDKN1B	CASP3		CDKN1A					BDNF	INS1			TNFRSF11B
AJUBA	ACTN1	ACADSB	AKT1	CYP2C	CFTR		GSR					CTNNB1	LEP			TNFSF11
AMOTL2	ADAM9	ACADVL	ATM	CYP2C18	CYP1A1		HMOX1					CYP11A1	MGAM
ANGPT2	ADIPOQ	ACO2	BAD	CYP2C8	CYP3A4		ICAM1					CYP3A4	NPY
ANGPTL2	ADIPOR1	ACSL1	BAX	CYP2C9	IFNG		IL1B					DBH	PPARGC1A
ANKRD37	ADM	ACSL4	BCL2	GJA1	IL12B		IL6					DRD2	SLC2A1
APOB	AGT	ACTA2	BCL2L1	INS1	IL1B		KCNJ11					DRD3	SLC2A4
APOC1	AJUBA	ACTB	CASP3	KCNJ11	INS		NCF1					ESR1	SQSTM1
APOC2	AKT1	ACTC1	CASP7	MKI67	IRS1		NOS3					FSHB	TNF
APOC3	ALOX5	ACTG2	CCL2	RB1	KCNJ11		RELA					GDNF
APP	AMOTL2	ADA	CCND2	TP53	KCNJ8		SOD2					GH1
ATF3	ANGPTL2	ADAM12	CCNE1	UGDH	KCNK18		TNF					GNAI2
BACE1	ANKRD37	ADAM9	CCNG1		LYZ		TNFAIP3					HMOX1
BSG	APP	ADAMTS1	CEBPA		NOS2							INS
BZW1	ATF3	ADIPOQ	CPT1A		SLC6A3							LHB
C10ORF10	BAX	ADIPOR2	CRP		SUR							MAPK1
C14ORF169	BCL2	ADM	CYP11A1		TH							MAPK3
CCL11	BGLAP	ADRB2	CYP19A1		TNF							NFE2L2
CCL2	BIRC5	ADRB3	CYP1A2									NGF
CCL5	BZW1	AGPAT4	CYP3A4									NOS2
CCNA2	C10ORF10	AGPAT9	DUSP4									NR5A2
CCNB1	C14ORF169	AGPS	EGR1									PCNA
CCND3	CAR	AGRN	FABP2									POMC
CCNE1	CASP3	AGT	FASN									PRKCD
CD36	CCL11	AGTR1	FBP1									PRL
CDK2	CCL2	AHR	FSH									PRLR
CDKN1A	CCNA2	AJAP1	G6PC									SCARB1
CDKN1B	CCNB1	AJUBA	GADD45A									SOD1
CDKN1C	CCND1	AKAP12	GCG									STAR
COG8	CCND3	ALDH1A2	GSN									STAT5A
CPT1B	CCNE1	ALDH1A7	GSTP1									TGFA
CRYAB	CD36	ALDH2	HMOX1									TGFB1
CTGF	CDH1	AMOTL2	HNF4A									TNF
CTNNB1	CDK1	ANGPTL2	HRH2									VEGFA
CXCL12	CDK2	ANGPTL4	HSD3B									VIP
CXCR4	CDKN1A	ANKRD37	IL1B
CYP17A1	CDKN1B	ANXA3	IL6
CYP2B6	CDKN1C	ANXA6	IL8
CYP2C8	CEBPA	APCDD1	INS
CYP3A2	CFD	APLP2	IRS1
CYP3A4	COG8	APOC3	JUND
DGAT1	COL10A1	APP	KRT80
DGAT2	COL1A1	AQP2	MAPK1
DLG1	CPT1A	AQP8	MAPK10
DNAAF2	CREB1	ARG1	MAPK3
DUSP10	CRYAB	ARHGAP5	MAPK9
ERBB2IP	CTGF	ATF3	MRP2
FABP4	CTNNB1	ATP2B1	MYC
FAM210A	CXCR4	B3GNT4	NOS1
FJX1	CYP17A1	BAG2	PCK1
GEM	CYP2B6	BAX	PLAT
GEMIN4	CYP2C	BCL2	PPARA
GOT1	CYP2C19	BECN1	PPARG
GPT	CYP2C8	BGLAP	PRKAA1
GSTA2	CYP2C9	BIRC5	PRKAA2
GSTP1	CYP2J2	BMP4	PRKCZ
HILPDA	CYP3A	BZW1	PXR
HNRPDL	CYP3A23/3A1	C10ORF10	RELA
HSD3B2	CYP3A4	C14ORF169	RUNX2
HSPA1L	CYP3A5	C16ORF46	SEPHS2
ICAM1	CYP3A7	C18ORF1	SEPP1
ICAM3	DLG1	C4ORF32	SLC22A1
ID2	DNAAF2	C7ORF45	SLC22A2
IFNG	DUSP10	CACNA2D1	SLC22A3
IL13	E2F1	CALCRL	SLC2A4
IL1B	EDN1	CALML4	SLCO1A2
IL4	EGR1	CARD14	STAR
IL5	ERBB2IP	CASP3	STK11
INS	ERO1L	CAT	TGFB1
INS1	FABP1	CAV1	TNF
ITGAV	FABP2	CAV2	VWF
KLF2	FABP4	CCL11
LITAF	FAM210A	CCL17
MAPK1	FASN	CCL2
MB21D2	FJX1	CCL5
MMP13	FN1	CCL7
MMP9	GADD45A	CCNA2
MXD1	GEM	CCNB1
NDRG1	GEMIN4	CCND1
NFKBIB	GLO1	CCND2
NOS2	GSN	CCND3
NPHS1	GSTA2	CCNE1
NR4A1	GSTM1	CCR7
NR4A3	GSTP1	CD1A
PPARA	GSTT1	CD1D
PPARG	HAGH	CD300A
PTGS2	HILPDA	CD300LB
RANBP2	HNF4A	CD300LF
RB1	HNRPDL	CD36
REEP3	HSD3B2	CD40
RELA	HSPA1L	CD80
RETSAT	ID2	CD86
RICTOR	IL1B	CDC42
RORC	IL5	CDH1
RPUSD2	IL6	CDH13
SCNN1G	INS	CDK2
SERPINE1	INSIG1	CDK4
SLC27A1	INSIG2	CDKN1A
SLC2A14	ITGAV	CDKN1B
SLC2A3	KLF2	CDKN1C
SLTM	LEP	CDO1
ST3GAL1	LITAF	CDR2L
TGFB1	LPL	CEBPA
THBS1	MAP2K1	CEBPB
TIMP1	MAPK1	CEBPD
TMEM177	MAPK3	CELF2
TNF	MB21D2	CFLAR
TPI1	MPO	CGB
UMPS	MRP2	CHRNA4
VASN	MXD1	CLEC3B
VCAM1	NDRG1	CNN2
VEGFA	NFE2L2	COG8
ZC3H11A	NOS2	COL11A1
ZFP36	NR1I2	COL1A1
ZNF117	NR1I3	COL3A1
ZNF681	NR4A1	COL4A1
	NR4A3	COL5A3
	ODC1	COL6A3
	PARP1	COX2
	PCNA	COX7A1
	PPARA	COX8B
	PPARG	CP
	PPARGC1A	CPT1B
	PTGS2	CREB1
	RAF1	CRKL
	RANBP2	CRP
	RB1	CRYAB
	REEP3	CS
	RICTOR	CSF1
	RPUSD2	CSN2
	RUNX2	CTGF
	RXRA	CTNNB1
	SEMA6B	CTTNBP2
	SKP2	CX3CL1
	SLC2A14	CXCL1
	SLC2A3	CXCL12
	SLC5A5	CXCL5
	SLTM	CXCR4
	SOD2	CYBA
	SP1	CYCS
	SREBF1	CYP17A1
	ST1A8	CYP2B6
	ST3GAL1	CYP2C8
	SULT1A1	CYP2D6
	SULT1A3	CYP3A4
	TGFA	DCN
	TGFB1	DECR1
	THRA	DGAT1
	TMEM177	DGAT2
	TNF	DHRS3
	TNFRSF11B	DHRS9
	TNFSF11	DLD
	TP53	DLG1
	TPM1	DMPK
	TXN	DMWD
	UGT1A1	DNAAF2
	UGT1A10	DNAJB9
	UGT2B	DNAJC5B
	UMPS	DUSP10
	VASN	EDN1
	VEGFA	EDNRB
	VEGFB	EGF
	ZC3H11A	EHF
	ZFP36	EIF4EBP1
	ZNF117	ELOVL3
	ZNF366	ELOVL6
	ZNF681	EMB
		EML4
		EMP1
		ENPP2
		EPHX2
		ERBB2IP
		ESR2
		ETFA
		ETFB
		ETFDH
		ETS2
		FABP1
		FABP4
		FAM101B
		FAM109A
		FAM210A
		FAR2
		FAS
		FASN
		FBN2
		FBXO15
		FBXO32
		FDPS
		FDX1
		FGF7
		FGFR2
		FIGF
		FJX1
		FKBP5
		FMO1
		FMO3
		FN1
		FOXO1
		FSCN1
		FUT7
		FZD2
		G6PC
		GABARAPL1
		GADD45G
		GALK1
		GAS2
		GAS6
		GBP2
		GCLC
		GDF15
		GEM
		GEMIN4
		GFAP
		GK
		GLNS-PS1
		GNAI2
		GOLGA8A
		GOT2
		GPAM
		GPC1
		GPD1L
		GSK3B
		GSTA2
		GSTA4
		GSTP1
		GSTT1
		GUCY1B3
		GUSB
		GYG1
		GYS2
		HADH
		HILPDA
		HIPK2
		HIST1H2BD
		HK2
		HLX
		HMGCR
		HMOX1
		HMOX2
		HNF4A
		HNRPDL
		HP
		HSD11B1
		HSD3B2
		HSPA1L
		HSPA9
		HSPD1
		ICAM1
		ICAM3
		ID2
		IDH1
		IDH3B
		IFI202B
		IFI204
		IFI47
		IFIT1
		IFNAR2
		IGF1
		IGF1R
		IGF2R
		IGFBP3
		IGFBP5
		IIGP1
		IL10
		IL10RB
		IL12A
		IL12B
		IL13
		IL18
		IL1B
		IL1R1
		IL1RAP
		IL1RL1
		IL4
		IL5
		IL6
		IL8
		INPP5F
		INS
		INS1
		IPCEF1
		IRS2
		ITGAE
		ITGAV
		KIAA0040
		KIAA0746
		KIAA1161
		KIAA1274
		KIFC2
		KITL
		KLF2
		KLF4
		KLF5
		LAIR1
		LAMB1
		LAMP1
		LBP
		LCN2
		LDHB
		LELP1
		LEP
		LGALS1
		LIFR
		LILRA1
		LIPA
		LIPC
		LIPE
		LITAF
		LPIN1
		LPL
		LRP11
		MAN1C1
		MAP3K6
		MAP4K1
		MAPK1
		MAPK3
		MAPK4
		MARCKS
		MB21D2
		MBP
		MDH2
		METRN
		MFAP5
		MGAT4C
		MGLL
		MGST1
		MMP16
		MOG
		MSMO1
		MT1
		MT2
		MTOR
		MUT
		MXD1
		NAMPT
		NCF1
		NCF2
		NDRG1
		NDRG2
		NFKBIA
		NID2
		NOS2
		NOS3
		NPPA
		NPPB
		NR1H3
		NR3C1
		NRIP1
		NUDT7
		OGN
		OLR1
		OMA1
		OMD
		ORM1
		ORM2
		ORM3
		PAPSS2
		PCDH7
		PCK1
		PCNA
		PCX
		PDGFRB
		PDHA1
		PDK4
		PDLIM2
		PDLIM4
		PER1
		PFKM
		PHLDA2
		PLA2G2A
		PLAT
		PLBD1
		PLIN2
		PLK2
		PLSCR2
		PLTP
		PLXNA2
		PNPLA2
		PON2
		POR
		PPAP2B
		PPAR
		PPARA
		PPARB
		PPARG
		PPARGC1A
		PRAM1
		PRKAA1
		PRKCA
		PTEN
		PTGIS
		PTGS2
		PTP4A1
		PYGM
		QPRT
		RAB15
		RAB20
		RAC1
		RANBP2
		RAP1GAP
		RARB
		RASA3
		RB1
		RBKS
		RBP1
		RDH10
		REEP3
		RELA
		REPS2
		RETSAT
		RFXAP
		RGS2
		RHOBTB3
		RICTOR
		RORC
		RPIA
		RPS6
		RPS6KA4
		RPS6KB1
		RPUSD2
		RRAS
		RUNX2
		RXRA
		SCARB1
		SCD
		SCD1
		SDC2
		SELE
		SELPLG
		SERPINA3N
		SERPINE1
		SERPING1
		SFRP1
		SFRP2
		SGK1
		SIGLECP3
		SIRPB1
		SLC12A1
		SLC12A2
		SLC26A11
		SLC27A1
		SLC2A14
		SLC2A3
		SLC2A4
		SLC4A4
		SLITRK4
		SLPI
		SLTM
		SNAI3
		SOCS3
		SOD2
		SOD3
		SP1
		SPHK1
		SPP1
		SQLE
		SREBF1
		ST3GAL1
		STAT3
		STUB1
		SULT1A1
		TACSTD2
		TAGLN
		TBC1D2
		TBL1X
		TBL2
		TEAD4
		TGFB1
		TGM2
		TGTP2
		THBS1
		THBS2
		THBS3
		TIMP1
		TIMP2
		TIMP3
		TM7SF4
		TMEM14A
		TMEM177
		TNF
		TNFRSF10B
		TNFRSF11B
		TNFSF12
		TNS1
		TOB1
		TP53
		TPI1
		TPM1
		TPM3
		TRPM6
		TUBA1A
		TUBB2A
		TUBB3
		UCP1
		UCP2
		UGP2
		UMPS
		VASN
		VCAM1
		VCAN
		VEGFA
		WFS1
		WISP2
		WNT10B
		XDH
		XIAP
		YWHAH
		ZBTB7B
		ZC3H11A
		ZFP36
		ZNF117
		ZNF681
